# Supplementary material for: Adipocyte-Derived β-Hydroxybutyrate Confers Metabolic Stress Resistance in Multiple Myeloma
Source: Research Square preprint supplement (doi:10.21203/rs.3.rs-6598368/v1), 2025-06-19
Supplement: Supplementary file 1 [file d6c28cb50251ea85c856e72b.docx]

**Supplemental Information**

**Adipocyte-Derived β-Hydroxybutyrate Confers Metabolic Stress Resistance in Multiple Myeloma**

Chen Song1,2#, Peng Yang3#, Yu Li2#, Tao Xia2#, Rui Li2, Wenjun Li2, Yansheng Wang6, Mengmeng Guo1, Xueyi Feng2, Tiantian Jia2, Junjie Lv5, Chenfeng Liu2, Xunxia Bao1,2, Qi Wang2, Yuan Yao2, Qian Dai2*, Wei Wei5*, Huan Liu4*, Zongwei Li1,2*.

**The file includes:**

- Materials and Methods
- Supplemental Figures (S1-S9)
- Supplemental Tables (S1-S4)
- References

**Materials and Methods**

**Antibodies, peptides, and reagents**

The plasmid pLKO.1-puro (#8453) was obtained from Addgene, and pCDH-CMV-MCS (#CD500B-1) was purchased from System Biosciences. Unless otherwise specified, primary antibodies for Western blotting and immunohistochemical analysis were sourced from Cell Signaling Technology, while chemicals were acquired from MedChemExpress (MCE). Anti-CD138 antibody (#390206) and APC anti-mouse CD138 (#142506) from Biolegend, anti-Strep-Tag II antibody (#MA5-17283), NAT10 (#PA5-113336), Goat anti-Mouse IgG secondary antibody (#A-11001) and Goat anti-Rabbit IgG secondary antibody (#A-21428) from Thermo Fisher Scientific, anti-HMGCS2 antibody (#ab137043) from Abcam. Lysosomal-protease inhibitor leupeptin (#14026), calpain inhibitor MDL-28170 (#14283), HSP90 inhibitor 17-AAG (#11039), NAT10 inhibitor Remodelin (#17346), OXCT1 inhibitor Pimozide (#16222), AMPK activator A-769662 (#11900) and Metformin (#16921) from Cayman Chemical. Antibodies against IRF4 (acetyl K87) and peptides consisting of amino acids 74-101 of IRF4 protein with or without acetylation at 87 were custom made by GL Biochem (Shanghai) Ltd. Immunohistochemical tissue microarrays (#MMP961) were commercially procured from Wuhan Tanda Biotechnology Co., Ltd.

**Mice**

Male NCG (NOD/ShiLtJGpt-*Prkdcem26Cd52Il2rgem26Cd22/*Gpt), C57BL/6J wild-type mice and nude (BALB/cNj-Foxn1nu/Gpt) mice were purchased from GemPharmatech (Nanjing, China). Male B6.129P2-Tcrb*tm1Mom/*J mice were purchased from Jackson Laboratory. All mice (6-8 weeks old) were housed under controlled conditions (20-25°C, 45-64% humidity) with a 12-hour light/dark cycle and ad libitum access to water (5 mice per cage).

NCG mice, nude mice and Tcrb*tm1Mom/*J mice were fed with irradiated rodent diet (Research diet, #D12450H). C57BL/6J mice were fed a high-fat diet (60% kcal, Research diet, #D12492) for 20 weeks to establish DIO model(Hariri and Thibault, 2010). Control mice were fed with a normal diet (10% kcal, Research diets, #D12489).

C57BL/6N-*Hmgcs2em1Cflox*/Cya mice (*Hmgcs2*flox/flox, Cyagen) were crossed with C57BL/6JGpt-Tg (Adipoq-iCre)166/Gpt (Adipoq-Cre, GemPharmatech) mice, to generate Adipose-Tissue-Specific *Hmgcs2* Knockout Mice (*Hmgcs2*flox/flox, Adipoq-Cre). Mice genotypes were tested by PCR amplification of DNA extracted from tail. Tissue-specific deletion of exon 2 of *Hmgcs2* was verified using *Hmgcs2*flox/flox primer pair (FW 5’-TTTCAAGCAGTACCACTCCCTAAC-3’; RV 5’-GTCAGGATCTCTTATTTCACCCCAG-3’) and Cre recombinase primer pair (Cre-FW 5’-ATTTGCCTGCATTACCGGTCG-3’; Cre-RV 5’-CAGCATTGCTGTCACTTGGTC-3’). All animal experiments were conducted in accordance with the guidelines approved by the Animal Ethics Committee of Anhui Medical University.

**Cell Cultures**

All cells were maintained at 37 ℃ with 5% CO2 in a cell incubator with 10% fetal bovine serum (HyClone, #SH30406.02) and 1% penicillin/streptomycin (Gibco, #11548876). The myeloma cell line ARP1 was kindly provided by the University of Arkansas, and the murine myeloma cell line Vk12598 was kindly provided by the Mayo Clinic. Other cells, such as human myeloma cell lines RPMI8226, ARH77, U266, H929, IM-9, human embryonic kidney epithelial cells HEK293T, mouse bone marrow stromal cell OP9 and mouse myeloma cell MOPC315 were purchased from the American Type Culture Collection (ATCC, USA). The human myeloma cell line OPM2 was obtained from Guangzhou Cellcook Biotech Co., Ltd. (CELLCOOK, China), and the mouse myeloma cell line 5TGM1 was acquired from Wuhan Pricella Life Technology Co., Ltd. (Pricella, China). Myeloma cells were cultured in RPMI1640 medium. HEK293T cells and OP9 cells were maintained in Dulbecco’s modified Eagle’s medium (DMEM). 5TGM1 cells were cultured in IMDM medium. In some experiments using various inhibitors, DMSO (Sigma, #D2650) or PBS was used as controls for the inhibitors. Mature adipocytes were derived from differentiation of human MSCs and mouse OP9 stromal cells or isolated from adipose tissues of *Hmgcs2*flox/flox or *Hmgcs2*flox/flox-Adipoq-Cre mice. Detailed methods on generation and isolation of adipocytes and collection of conditioned medium were described in the Method Details.

**Adipocyte Isolation and Culture**

Mouse adipose tissue-derived adipocytes were isolated from surgical specimens using collagenase digestion as described (Mitry and Hughes, 2011). For human adipocyte differentiation, mesenchymal stem cells (MSCs) were cultured in differentiation medium consisting of DMEM supplemented with 10% FBS, 1 mM dexamethasone (MCE, #HY-14648), 0.2 mM indomethacin (MCE, #HY-14397), 10 μg/mL insulin (MCE, #HY-P0035), and 0.5 mM 3-isobutyl-1-methylxanthine (IBMX; MCE, #HY-12318) for two weeks. Mouse OP9 stromal cell differentiation was induced by treatment with 2 mM rosiglitazone (MCE, #HY-17386) in α-MEM for two weeks. The characterization of mature adipocytes was performed as described previously(Li et al., 2021) . Conditioned medium was collected from adipocytes (AD-CM) cultured under glucose deprivation conditions. For some experiments, AD-CM was digested with proteinase K or fractionated (>3 kDa or <3 kDa) using Centricon filters (3 kDa cutoff, Millipore). Untreated medium was collected as a control.

**Cell Viability Assay**

To monitor cell viability with or without adipocytes under glucose deprivation conditions, MM cells were plated at a density of 1×10⁶ cells/well in 6-well plates for co-culture experiments with adipocytes (as shown in Figure 2A). For other conditions, cells were seeded at 1×10⁴ cells/well in 96-well plates and exposed to glucose deprivation with or without β-OHB supplementation. In studies evaluating IRF4 variants, MM cells stably expressing HA-tagged wild-type (WT), K87Q, or K399Q IRF4 were plated at 1×10⁴ cells/well in 96-well plates and subjected to either glucose deprivation or 17-AAG treatment. Viability was measured using the CellTiter-Glo Luminescent Assay (Promega), following the manufacturer’s protocol.

**Synergy Determination with SynergyFinder**

ARP1 cells were seeded in 96-well plates (1.5×10⁴ cells/well), and viability was assessed using the CellTiter-Glo Luminescent Assay (Promega, #7570) following treatment with Metformin (Cayman Chemical, #16921) in combination with either Remodelin or Pimozide. Drug concentrations were selected based on their respective IC₅₀ values.

For synergy analysis, Metformin was tested at 100, 120, 140, 160, and 180 μM, while Remodelin was evaluated at 1, 2, 4, 6, and 8 μM, and Pimozide at 1, 2, 6, 8, 10, 12, and 16 μM. Drug interactions were analyzed using SynergyFinder (Ianevski et al., 2022) (<https://synergy-finder.fimmm.fi>), which calculated the survival index and zero interaction potency (ZIP) scores. A ZIP score > 0 indicates synergy, and > 10 denotes strong synergy. Additionally, drug combination response heatmaps were generated to evaluate therapeutic potential.

**Quantitative Real-time PCR**

Total RNA was extracted from samples using the RNA isolater Total RNA Extraction Reagent (Vazyme Biotech, # R401-01) according to the manufacturer's protocol. First-strand cDNA was synthesized from 1 μg of total RNA using the HiScript III-RT SuperMix (Vazyme Biotech, #R323-01). Quantitative PCR amplification was performed in triplicate using SYBR qPCR Master Mix (Vazyme Biotech, #Q711-02) on a StepOnePlus™ Real-Time PCR System (Applied Biosystems, USA) under the following cycling conditions: initial denaturation at 95°C for 10 min; 40 cycles of 95°C for 15 s and 60°C for 1 min. All primer sequences used for amplification are provided in Tables S1 and S2.

**Plasmid Constructs and shRNA Knockdown**

The following human expression constructs were subcloned into the pCDH-CMV-MCS vector (System Bioscience, #CD500B-1): HA-tagged IRF4 (full-length and truncations: aa 1-139, 1-238, 1-420, 1-451, 139-238, 238-420), GFP-tagged IRF4, HA-tagged AMPK α1/α2/β/γ, Flag-tagged HSP90α/β, Strep-tagged HSP90α/β, Strep/Flag-tagged TRIM21, HA-tagged KAT2B, and Flag-tagged NAT10. Mut Express II Fast Mutagenesis Kit V2 (Vazyme Biotech, #C214-01) was used to generate IRF4 mutants (K87Q, K399Q, K399R) from the wild-type template. For knockdown experiments, lentiviral pLKO.1 vectors encoding shRNAs targeting *FBXW11*, *TRIM21*, *NAT10*, *OXCT1*, and *HSP90* were packaged using psPAX2/pMD2.G helper plasmids. The primer sequences used for shRNA constructs are listed in Table S3. All plasmids were purified using the EndoFree QIAGEN Plasmid Maxi Kit (#12162). For transient transfection, plasmids were delivered at a 1:3 DNA: Lipofectamine 3000 (Thermo Fisher Scientific, #L3000001) ratio. Stable cell lines were generated via lentiviral transduction followed by 72-hour puromycin selection.

**Flow Cytometry Analysis**

Bone marrow cells were harvested by flushing mouse femurs with ice-cold PBS containing 2% FBS. Splenocytes were prepared by mechanically dissociating spleens through a 70 μm cell strainer (Corning) in PBS supplemented with 2% FBS. Subsequently, cell suspensions were treated with ACK lysing buffer (Thermo Fisher Scientific, #A1049201) for 5 min at room temperature to remove red blood cells, followed by centrifugation at 4,000 rpm for 5 min at 4°C. For immunostaining, cells were incubated with APC-conjugated anti-mouse CD138 (Syndecan-1) antibody (BioLegend, #103012) in the dark at 4°C for 30 min. After two washes with PBS containing 2% FBS, the stained cells were resuspended in 300 μL of PBS with 2% FBS. Flow cytometry analysis was performed using a Cytoflex S instrument (Beckman, Germany). Data were processed and analyzed using FlowJo software (version 10).

**Immunofluorescence Staining**

IRF4-GFP-expressing ARP1 cells under various treatment conditions were fixed with 4% paraformaldehyde for 15 min at room temperature, followed by permeabilization with 0.3% Triton X-100 for 10 min. After blocking with 5% BSA for 1 h at room temperature, cells were incubated overnight at 4°C with anti-HSP90 antibody (1:100; Cell Signaling Technology, #4877). Following three PBS washes, nuclei were counterstained with DAPI (1 μg/mL) for 15 min. Fluorescence images were captured using a Zeiss LSM800 confocal microscope with ZEN imaging software.

**Western Blot assay**

For adipose tissue protein extraction, freshly dissected tissues were flash-frozen in liquid nitrogen and homogenized in ice-cold RIPA buffer (CST, #9806) containing 1 mM PMSF (Sigma Aldrich, #P7626), Complete Protease Inhibitor Cocktail, and 5 mm steel beads using a MagNA Lyser homogenizer (Roche; 6,500 rpm, 2 cycles of 2 min each). After centrifugation (14,000×g, 30 min, 4°C), the lipid layer was removed and samples were recentrifuged (14,000×g, 10 min) to obtain clear lysates. Cellular proteins were extracted using 1× RIPA buffer supplemented with protease inhibitors.

Protein concentrations were determined by BCA assay, with 20 μg of protein per sample resolved by SDS-PAGE (85 V, 150 min) and transferred to nitrocellulose membranes (0.45 μm; Bio-Rad, #1620115) using a wet transfer system (300 mA, 2 h). Membranes were blocked with 5% non-fat milk in TBST (2 h, RT) and incubated overnight at 4°C with the following primary antibodies: IRF4 (1:4,000; CST, #62834), IRF4(K87ac) (1:500; GL Biochem), HMGCS2 (1:2,000; Abcam, #ab137043), K48-Ubiquitin (1:1,000; CST, #8081), HSP90 (1:2,000; CST, #4877), TRIM21 (1:2,000; CST, #92043), Phospho-AMPKα (Thr172) (1:1,000; CST, #2535), AMPK (1:2,000; CST, #2532), NAT10 (1:2,000; Thermo Fisher Scientific, #PA5-113336), GAPDH (1:10,000; CST, #2118), Vinculin (1:1,000; CST, #4650), GFP (1:1,000; CST, #2955), HA (1:2,000; CST, #3724), Flag (1:2,000; CST, #14793), and Strep (1:2,000; CST, #5659). After incubation with appropriate HRP-conjugated secondary antibodies, proteins were detected by enhanced chemiluminescence. GAPDH or Vinculin served as loading controls. Band intensities were quantified using Image J software.

**Cycloheximide chase assay**

For protein degradation analysis, an initial baseline sample (t=0) was collected from myeloma cell cultures before any experimental treatments (including glucose deprivation, 17-AAG, dorsomorphin, metformin, 2-DG, β-OHB, or A-769662 administration). Protein synthesis was then inhibited by transferring cells to complete medium containing 100 μg/mL cycloheximide (CHX; MCE, #HY-12320). Cells were harvested at designated time points (e.g., 3, 6, 9 h or 12, 16, 20 h post-CHX treatment), with each sample normalized to an equivalent cell number. Cell pellets were obtained by centrifugation at 1,000 rpm for 3 minutes at 4°C, washed once with ice-cold PBS. Samples were stored at -80°C until all time points were collected. For protein analysis, cells were lysed in buffer containing protease and phosphatase inhibitors. After protein quantification by BCA assay, equal amounts (20 μg) of total protein were resolved by SDS-PAGE for western blot analysis.

**Immunoprecipitation (IP)**

Cells were lysed in ice-cold mild lysis buffer (containing 1 mM PMSF and protease inhibitor cocktail) with constant agitation for 30 min. After clarification, lysates containing 1 mg total protein were incubated with anti-HA-agarose, anti-Flag-agarose, or anti-GFP-agarose beads with rotation for 2 h at 4°C. The beads were then washed six times with lysis buffer, collected by centrifugation (5,000 rpm, 3 min), and resuspended in 20 μL 2× SDS sample buffer. Following denaturation at 95°C for 5 min, the proteins were separated by 10% SDS-PAGE along with 2% input controls, and subsequently transferred to 0.45 μm nitrocellulose membranes for immunoblotting analysis.

**CUT & Tag Assay**

The CUT&Tag assay was performed using the Hyperactive Universal CUT&Tag Assay Kit for Illumina (pG-Tn5, Vazyme Biotech, #TD904-01) according to the manufacturer's protocol (Pan et al., 2022). Briefly, HA-IRF4-expressing ARP1 cells under various treatment conditions were harvested and bound to Concanavalin A-coated magnetic beads. Cells were then resuspended in antibody buffer and sequentially incubated with: (1) primary anti-HA antibodies, (2) secondary antibodies, and (3) pA-Tn5 transposase. After transposase activation and tagmentation, genomic DNA was extracted, PCR-amplified, and purified for library preparation. The final sequencing library was purified using VAHTS DNA Clean Beads (Vazyme Biotech, #N411), quantified with the VAHTS Library Quantification Kit for Illumina (Vazyme Biotech), and subjected to 150 bp paired-end sequencing on an Illumina NovaSeq platform.

**ELISA for Serum M-Protein Quantification**

Serum M-protein levels in mice were measured using a commercial IgG2b ELISA kit (Thermo Fisher Scientific, #88-50430-88) following the manufacturer’s protocol. Briefly, whole blood was collected from euthanized mice and clotted at 25°C for 30 min. After centrifugation (4,000 rpm, 15 min, 4°C), the serum was separated and diluted 1:20,000 in sample dilution buffer. A standard curve was generated by regression analysis, and M-protein concentrations were interpolated from the curve.

**Immunohistochemistry**

Formalin-fixed, paraffin-embedded (FFPE) tissues from bone marrow microarrays and murine subcutaneous xenografts were sectioned at 4 μm thickness. After standard deparaffinization in xylene and rehydration through graded ethanol series, heat-induced epitope retrieval was performed in citrate buffer (pH 6.0) using microwave treatment. Tissue sections were incubated with primary antibodies against IRF4 (1:200; CST, #62834), phospho-AMPKα (Thr172) (1:100; CST, #2535), Ki-67 (1:100; CST, #9449), perilipin-1 (1:200; CST, #9349), and CD138 (1:100; Biolegend, #390206) using the EnVision FLEX detection system (Dako, K8002) according to the manufacturer's protocol. Hematoxylin (CST, #14166) was used for nuclear counterstaining. Quantitative assessment was performed using the VECTRA 3.0 Automated Quantitative Pathology Imaging System (PerkinElmer) at 20× magnification, with subsequent multispectral analysis and cell phenotyping conducted using Form Advanced Image Analysis Software (v2.4.8, PerkinElmer).

**Mass Spectrometry Analysis**

To identify IRF4-interacting proteins involved in regulating IRF4 stability under glucose metabolic stress, we performed immunoprecipitation (IP) in ARP1 cells expressing HA-IRF4 under normal glucose or GD conditions. The IP complexes were affinity-captured using anti-HA agarose beads, followed by tryptic digestion. The resulting peptides were analyzed using a nano-liquid chromatography-tandem mass spectrometry (nLC-MS/MS) system (Thermo Fisher Scientific) coupled with an Agilent 1100 series HPLC. MS/MS spectra were processed using SEQUEST (BioWorks Browser v3.3.1, Thermo Fisher Scientific) and searched against the NCBI database.

For mapping IRF4 acetylation sites, HA-IRF4 was immunoprecipitated from HA-IRF4-expressing ARP1 cells treated with or without β-OHB under GD conditions. The IP products were resolved by SDS-PAGE, and the Coomassie-stained IRF4 band was excised for in-gel trypsin digestion. Peptides were separated using an Easy nLC 1200 nano-flow system (Thermo Fisher Scientific) and analyzed by data-dependent acquisition (DDA) on a Q-Exactive HF-X mass spectrometer (Thermo Fisher Scientific). LC-MS/MS spectra were processed with MaxQuant (v2.0.1.0), and acetylation sites were identified with a Localization Probability threshold of ≥0.75 for reliable PTM assignment.

**Luciferase Reporter Assay**

The human OXCT1 promoter region (-2000 to -1 bp relative to the translation start site) was amplified and subcloned into the pGL2 basic vector. Briefly, the pGL2 vector was linearized with HindIII restriction enzyme and ligated with the OXCT1 promoter fragment using a multiple cloning site. The resulting construct (designated pGL2-OXCT1) was verified by sequencing. For luciferase activity assays, HEK293T cells were transiently transfected with the pGL2-OXCT1 reporter construct. After 48 hours, transcriptional activity was quantified using the CellTiter-Glo Luminescent Assay Kit (Promega) following the manufacturer's instructions. All primer sequences used for cloning are provided in Table S4.

***In Vivo* Mouse Experiments**

To investigate whether adipocytes confer resistance to 2-DG-induced metabolic stress in myeloma cells *in vivo*, 6-week-old male C57BL/6 mice were fed either a high-fat diet (HFD; 60% kcal) or a normal diet (ND; 10% kcal) for 20 weeks, with body weight monitored throughout the study. Mice receiving the ND served as controls. After diet induction, Vk12598 cells (2×106 cells/mouse) were injected intrafemorally into each mouse. One-week post-injection, mice were treated daily with intraperitoneal 2-DG (500 mg/kg) or an equivalent volume of vehicle control for 4 weeks. Tumor burden was assessed by measuring serum M-protein levels. Additionally, spleen and bone marrow were harvested, and the proportion of CD138+ cells was quantified by flow cytometry.

For the xenograft model, there are several settings. In Figure 1H, ARP1 cells (2×105 cells/sites) were injected alone into the left flank of NCG mice, while a mixture of ARP1 cells (2×105 cells/site) and human MSC-derived adipocytes (5×105 cells/site) was injected into the right flank. One-week post-injection, mice received daily intraperitoneal 2-DG (500 mg/kg). Tumor volumes were measured weekly, and after 4 weeks of treatment, tumors were excised and subsequently either weighed for quantitative analysis or fixed for immunohistochemical (IHC) staining. In Figure S1A and S1C, equal numbers of luciferase-labeled ARP1 cells (2×106 cells/site) either alone or co-injected with human MSC-derived adipocytes (5×105 cells/site) were intrafemorally injected into the left or right femurs, respectively, of NCG mice. Similarly, luciferase-labeled 5TGM1 cells (2×106 cells/site), alone or mixed with mouse OP9-derived adipocytes (5×105 cells/site), were injected into the left femurs of TCRbtm1Mom/J mice. Beginning one-week post-injection, mice received daily intraperitoneal injections of either 500 mg/kg 2-DG or an equivalent volume of vehicle control for four weeks. Bioluminescent signals were imaged 3 weeks after cell injection.

To investigate the combinatorial effects of metformin with either remodelin or pimozide, 6-week-old male C57BL/6J mice received intravenous injections of Vk12598 cells (2×10⁶ cells/mouse). Treatment commenced one week post-inoculation and continued for three weeks with administration every two days, including: (1) monotherapy groups - 200 mg/kg metformin (intraperitoneal injection) (Elgendy et al., 2019), 10 mg/kg remodelin (intraperitoneal injection) (Xie et al., 2023), or 10 mg/kg pimozide (oral gavage) (Zhu et al., 2024); (2) combination groups - metformin (200 mg/kg, i.p.) plus either remodelin (10 mg/kg, i.p.) or pimozide (10 mg/kg, oral); and (3) vehicle control groups (i.p. or oral). Tumor progression was monitored by serial serum M-protein measurements, and survival was recorded throughout the study.

For the alternate-day fasting (ADF) model, six-week-old male C57BL/6J mice were subjected to an ADF regimen consisting of fasting days (0 kcal) alternating with feeding days (20 kcal) for one week (Ezpeleta et al., 2023), with age-matched mice fed a normal diet serving as controls. All mice received intravenous injections of Vk12598 cells (2×106 cells/mouse). Three days post-inoculation, treatment was initiated with either 10 mg/kg pimozide (oral gavage every two days) or vehicle control (2% Tween-80), continuing until experimental endpoints. Blood samples were collected during feeding phases when mice resumed normal diet consumption. Tumor progression was assessed through weekly measurements of serum IgG2b levels. For metabolic profiling, additional blood samples were obtained during fasting phases to assess glucose and ketone body levels.

**Data Availability and Analytical Methods**

CUT&Tag sequencing data generated in this study have been deposited in the Gene Expression Omnibus (GEO) under accession number GSE290392 and are publicly accessible. Uncropped western blot membranes supporting all figures are provided as Data S1. The myeloma plasma cell dataset was downloaded from the GEO (GSE5900) and (GSE2658) (http://www.ncbi.nlm.nih.gov/geo/), comprising 559 plasma cell samples from myeloma patients and 22 plasma cell samples from healthy individuals. RNA-seq profiles and annotated clinical records for 859 MM cases were obtained through the MMRF-CoMMpass study (IA18) via the UCSC Xena database (https://xenabrowser.net/). Draw boxplots and correlation graphs between genes using the ggstatsprot package in R language. Kaplan-Meier curves stratified by median expression were generated using survival (v3.5-5) and survminer (v0.4.9) packages. Log-rank p-values were calculated for significance testing.

**Statistical Analysis**

All data visualization and statistical analyses were performed using established bioinformatics tools and statistical software. Heatmaps and volcano plots were generated using R studio with correspondent R package. Additional graphical representations and statistical comparisons were created using GraphPad Prism 9.0. Quantitative data are expressed as means ± standard error of the mean (SEM). Differences with p < 0.05 were considered statistically significant; ns, not significant; *P < 0.05; **P < 0.01; ***P < 0.001; ****P< 0.0001. All results were reproduced in at least three independent experiments.

**Supplementary Figures**


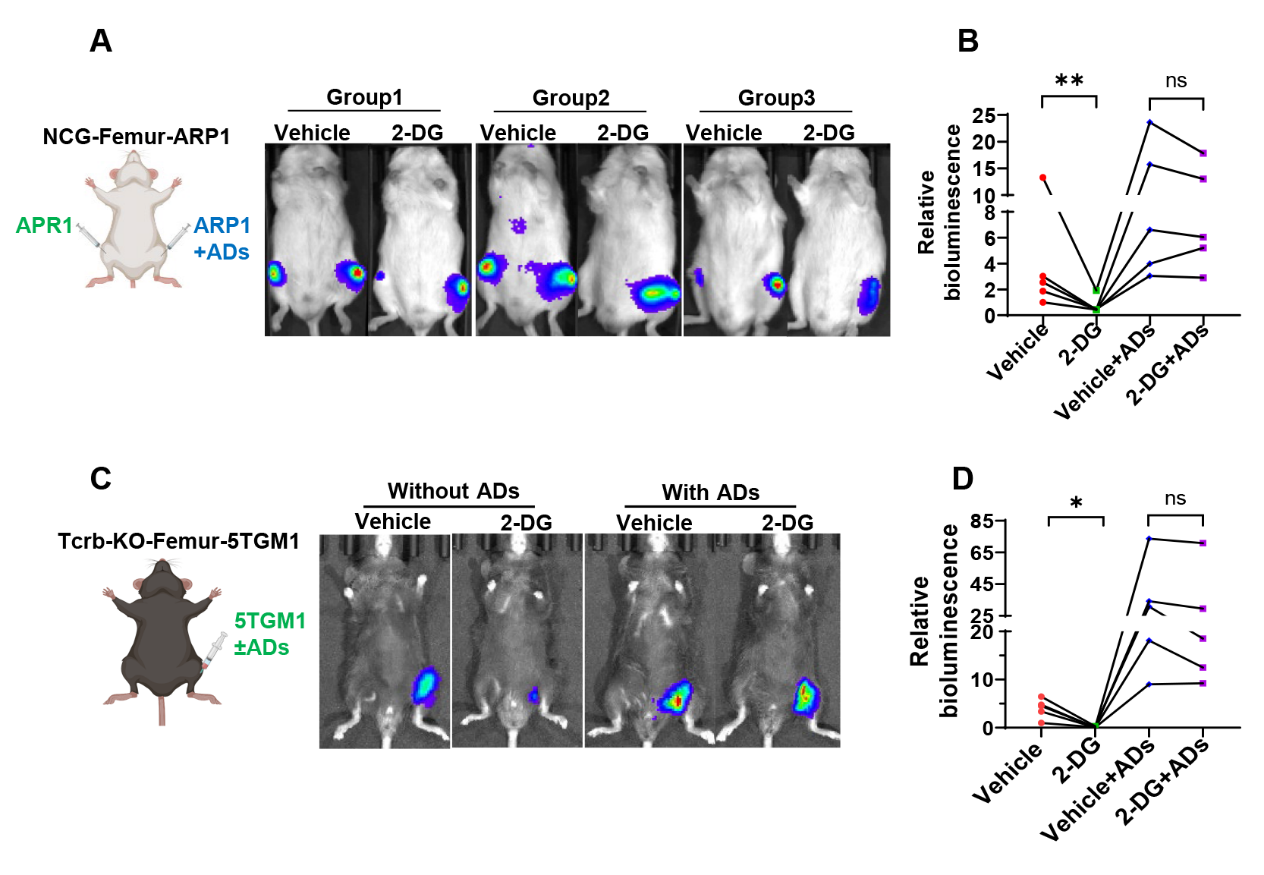


**Figure S1. Adipocytes promote myeloma cell resistance to 2-DG-induced metabolic stress *in vivo*.**

(A-B) Human myeloma xenograft model: NCG mice received intrafemoral injections of luciferase-labeled ARP1 cells (2×106 cells/site) alone (left femur) or co-injected with human MSC-derived adipocytes (5×105 cells/site, right femur). Beginning one week post-injection, mice were treated with daily intraperitoneal injections of 500 mg/kg 2-DG or vehicle control for 4 weeks. (A) Experimental design schematic (left) and representative bioluminescence images (right). (B) Quantitative analysis of tumor burden by bioluminescence intensity. (C-D) Murine myeloma syngeneic model: B6.129P2-Tcrb*tm1Mom*/Jmice were intrafemorally injected with luciferase-labeled 5TGM1 cells (2×106 cells/site) alone or in combination with OP9-derived adipocytes (5×105 cells/site) into right femurs. Mice received identical 2-DG treatment regimen as above. Statistical significance was determined by a two-tailed Student’s t-test (B, D). Ns, not significant; *P < 0.05; **P < 0.01.


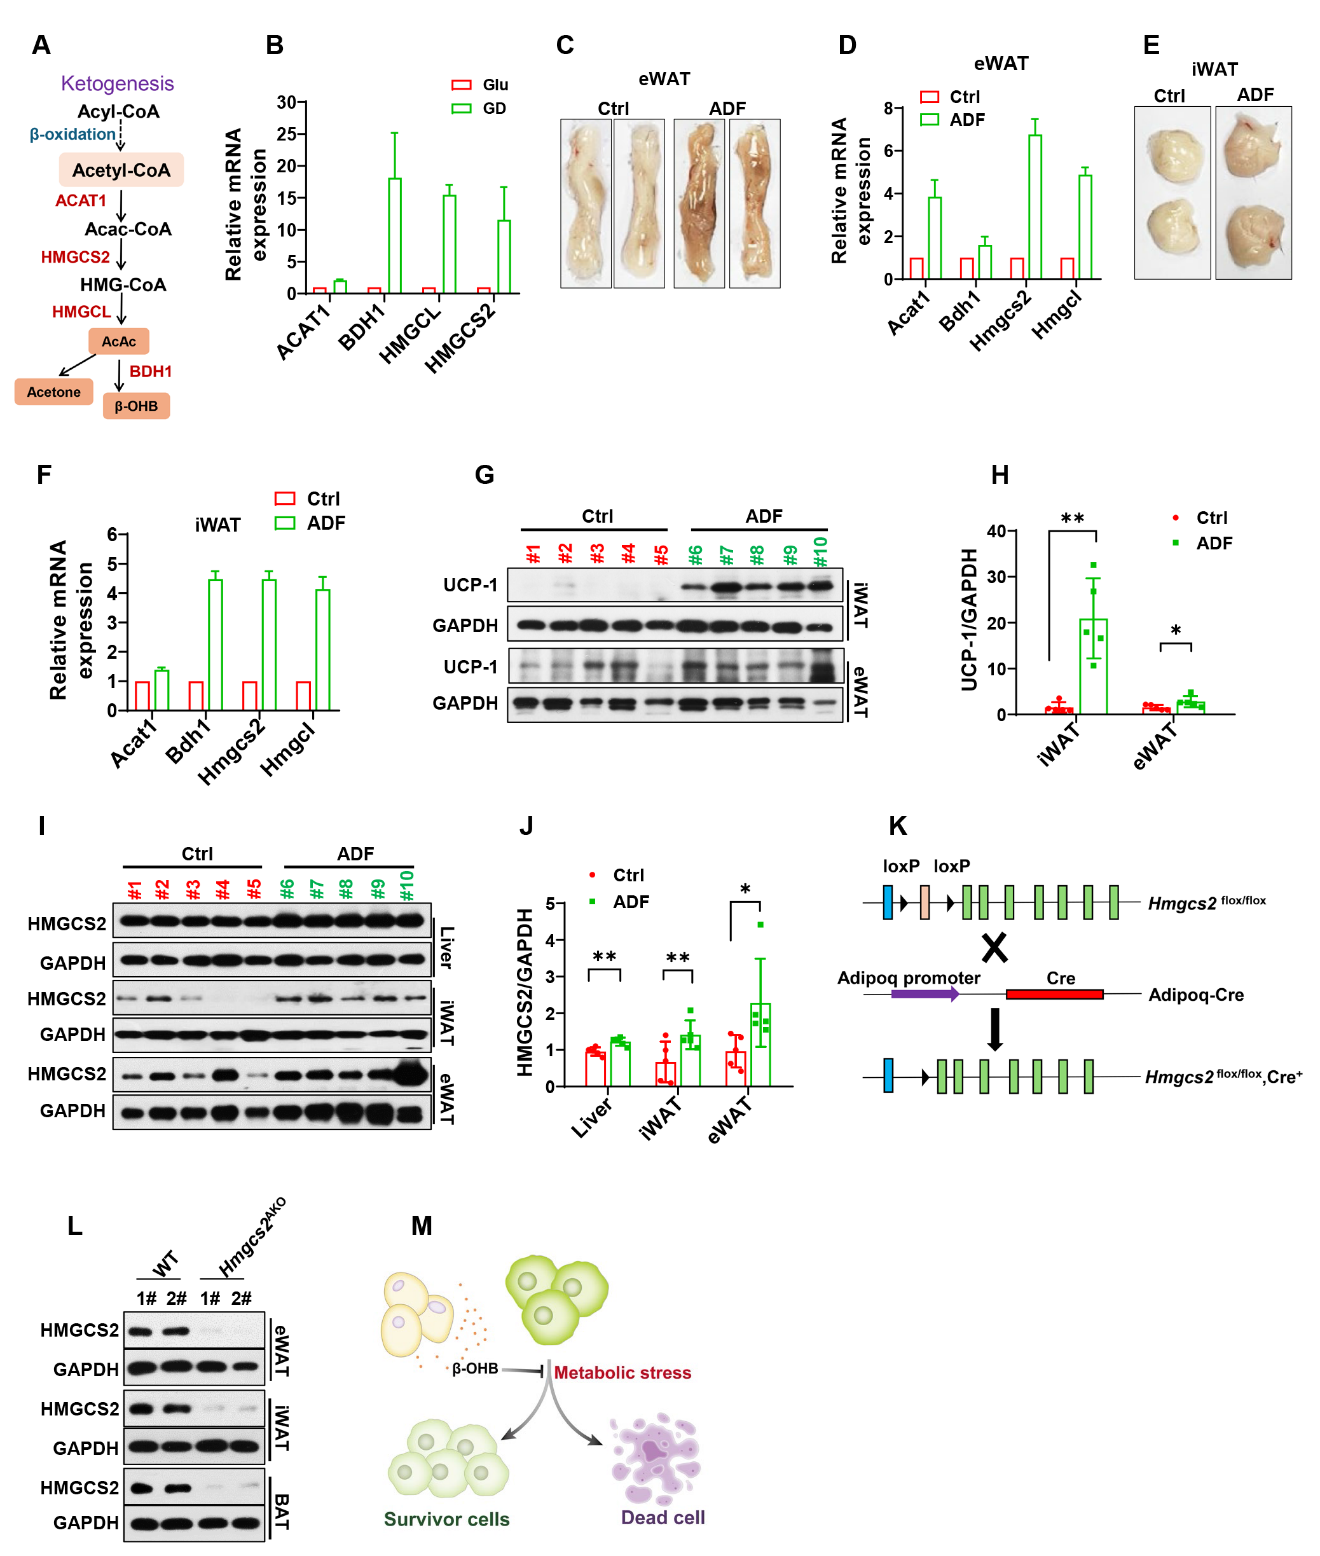


**Figure S2. Adipose tissue activates ketone body biosynthesis under metabolic stress conditions.**

(A) Schematic of the ketone body synthesis pathway. (B) Relative mRNA expression of ketogenesis enzymes (*ACAT1*, *BDH1*, *HMGCL*, *HMGCS2*) in human MSC-derived adipocytes under normal glucose or GD conditions. (C-H) C57BL/6J mice were subjected to alternate-day fasting (ADF) or normal feeding for 20 days (n=5). (C) Representative images of epididymal white adipose tissue (eWAT); (D) Relative mRNA levels of ketogenic enzymes in eWAT; (E) Representative images of inguinal white adipose tissue (iWAT); (F) Relative mRNA levels of ketogenic enzymes in iWAT; (G-H) Immunoblot analysis of UCP-1 protein expression in eWAT and iWAT after ADF. (I-J) Immunoblot analysis of HMGCS2 protein expression in liver, eWAT and iWAT after ADF. (K-L) Genetic validation of adipocyte-specific *Hmgcs2* knockout: (K) Breeding strategy for generating adipocyte-specific *Hmgcs2* knockout mice (*Hmgcs2*AKO) by crossing *Hmgcs2*flox/flox mice with Adipoq-Cre transgenic mice. (L) Western blot confirmation of *Hmgcs2* deletion in adipocytes from *Hmgcs2*WT and *Hmgcs*2AKO mice. (M) Proposed model: Metabolic stress induces ketone body production in adipocytes, which promotes myeloma cell survival under glucose restriction. Data represent mean ± SD from two independent experiments (n=5 mice/group). Statistical significance was determined by a two-tailed Student’s t-test. *P<0.05; **P<0.01; ns, not significant.


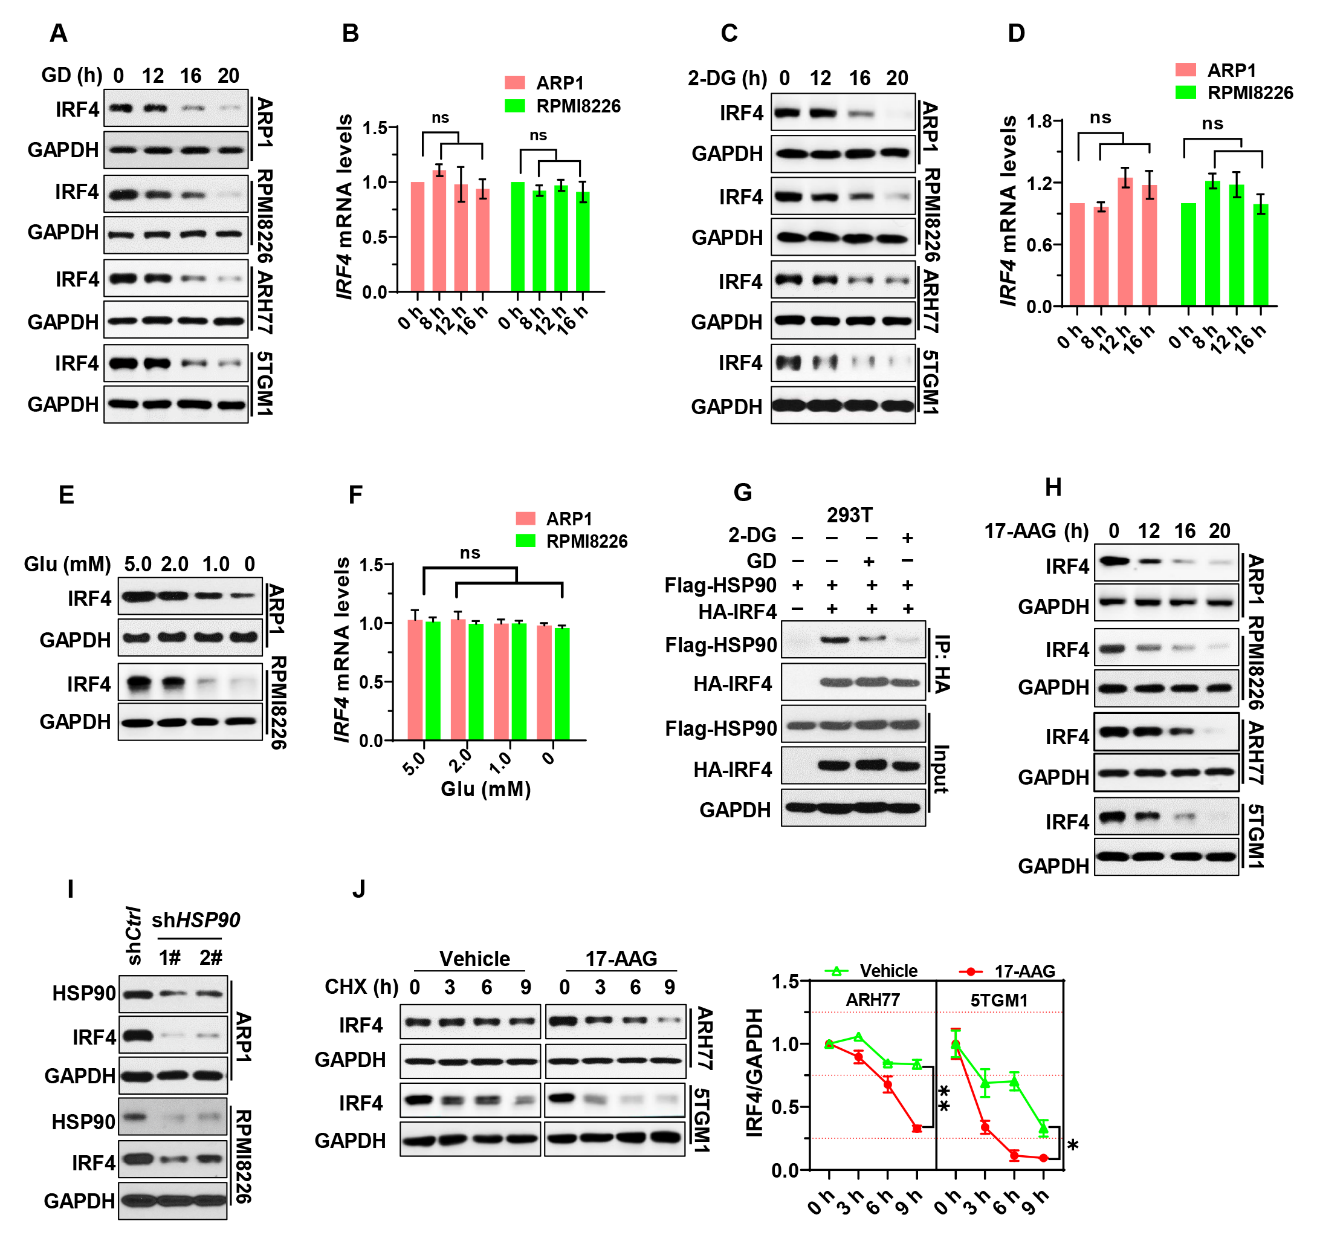


**Figure S3. HSP90 maintains IRF4 protein stability in myeloma cells.**

(A) Immunoblot analysis of IRF4 protein levels in myeloma cells cultured under GD conditions for the indicated durations. (B) Quantitative RT-PCR analysis of *IRF4* mRNA expression under GD conditions for the indicated durations. (C) Western blot of IRF4 protein levels following 10 mM 2-DG treatment. (D) Quantitative mRNA analysis of *IRF4* expression under 2-DG treatment. (E) Immunoblot of IRF4 protein levels in myeloma cells cultured with varying glucose concentrations (0-5 mM) for 16 h. (F) Corresponding *IRF4* mRNA expression analysis. (G) HA-IRF4 was immunoprecipitated from HEK293T cells co-expressing HA-IRF4 and Flag-HSP90, treated with either 2-DG (10 mM) or GD conditions. Input and IP fractions were analyzed by immunoblotting. (H) IRF4 protein kinetics in myeloma cells treated with 2 μM 17-AAG for the indicated durations. (I) Immunoblot analysis of IRF4 and HSP90 protein levels in myeloma cells expressing sh*Ctrl*, sh*HSP90*#1, or sh*HSP90*#2. (J) Cycloheximide chase assay showing IRF4 protein stability in the presence or absence of 2 μM 17-AAG (left). Quantification of IRF4 protein levels normalized to GAPDH (right). Data represent mean ± SD from three independent experiments. Statistical significance was determined by Student’s t-test (B, D, F) or two-way ANOVA with Bonferroni's post-hoc test (J). *P<0.05; **P<0.01; ns, not significant.


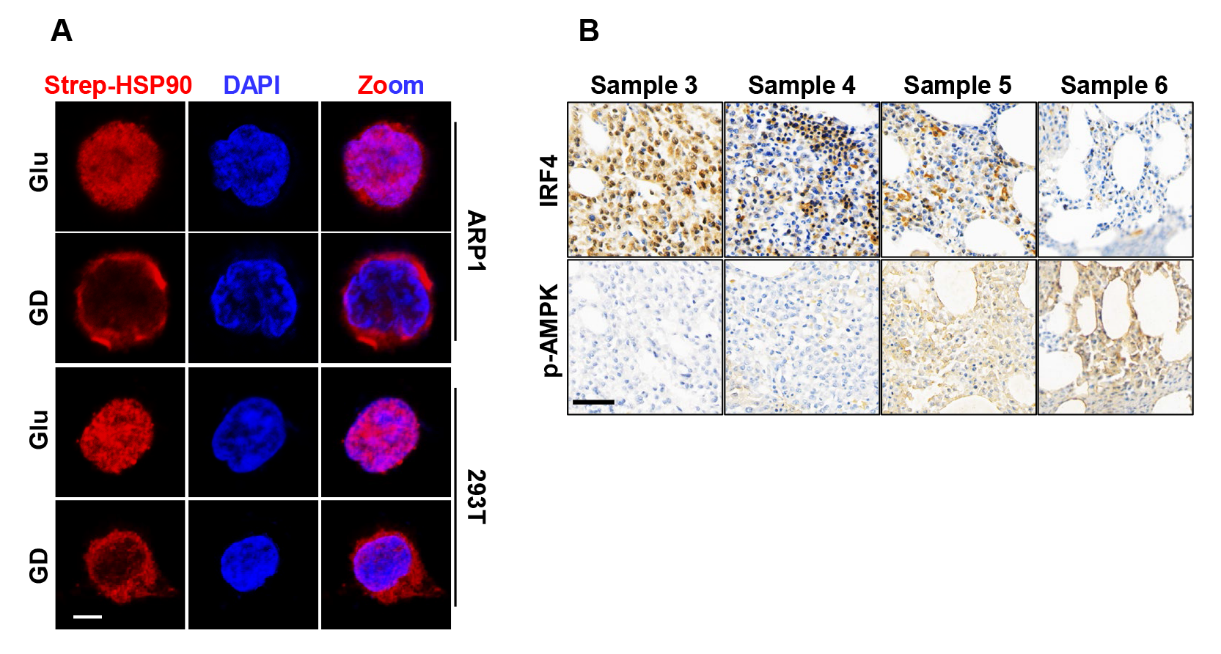


**Figure S4. AMPK-mediated phosphorylation regulates HSP90 nuclear export.**

(A) Representative immunofluorescence of Strep-HSP90 in cells with or without GD treatment. Nuclei were stained with DAPI (blue). Scale bar: 5 μm. (B) Representative immunohistochemical staining of IRF4 and phosphorylated AMPK (p-AMPK) in bone marrow biopsies from myeloma patients. Scale bars: 100 µm.


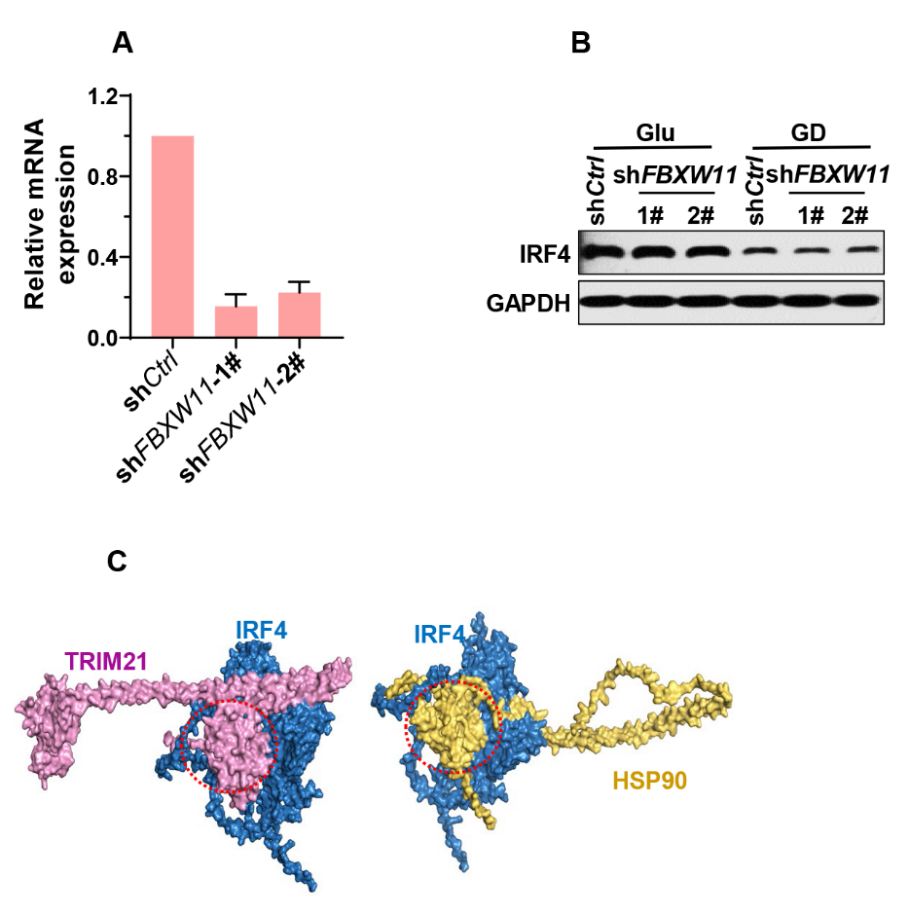


**Figure S5. TRIM21 regulates IRF4 stability under metabolic stress conditions.**

(A) Quantitative RT-PCR analysis of *FBXW11* mRNA levels in ARP1 cells infected with lentivirus carrying sh*Ctrl* or *FBXW11* shRNAs. (B) Immunoblot analysis of IRF4 protein levels in myeloma cells expressing sh*Ctrl*, sh*FBXW11*#1, or sh*FBXW11*#2 under normal glucose or GD conditions. (C) Computational modeling of the interaction between IRF4 and TRIM21 or HSP90 by AlphaFold. The diagram was generated by PyMOL software.


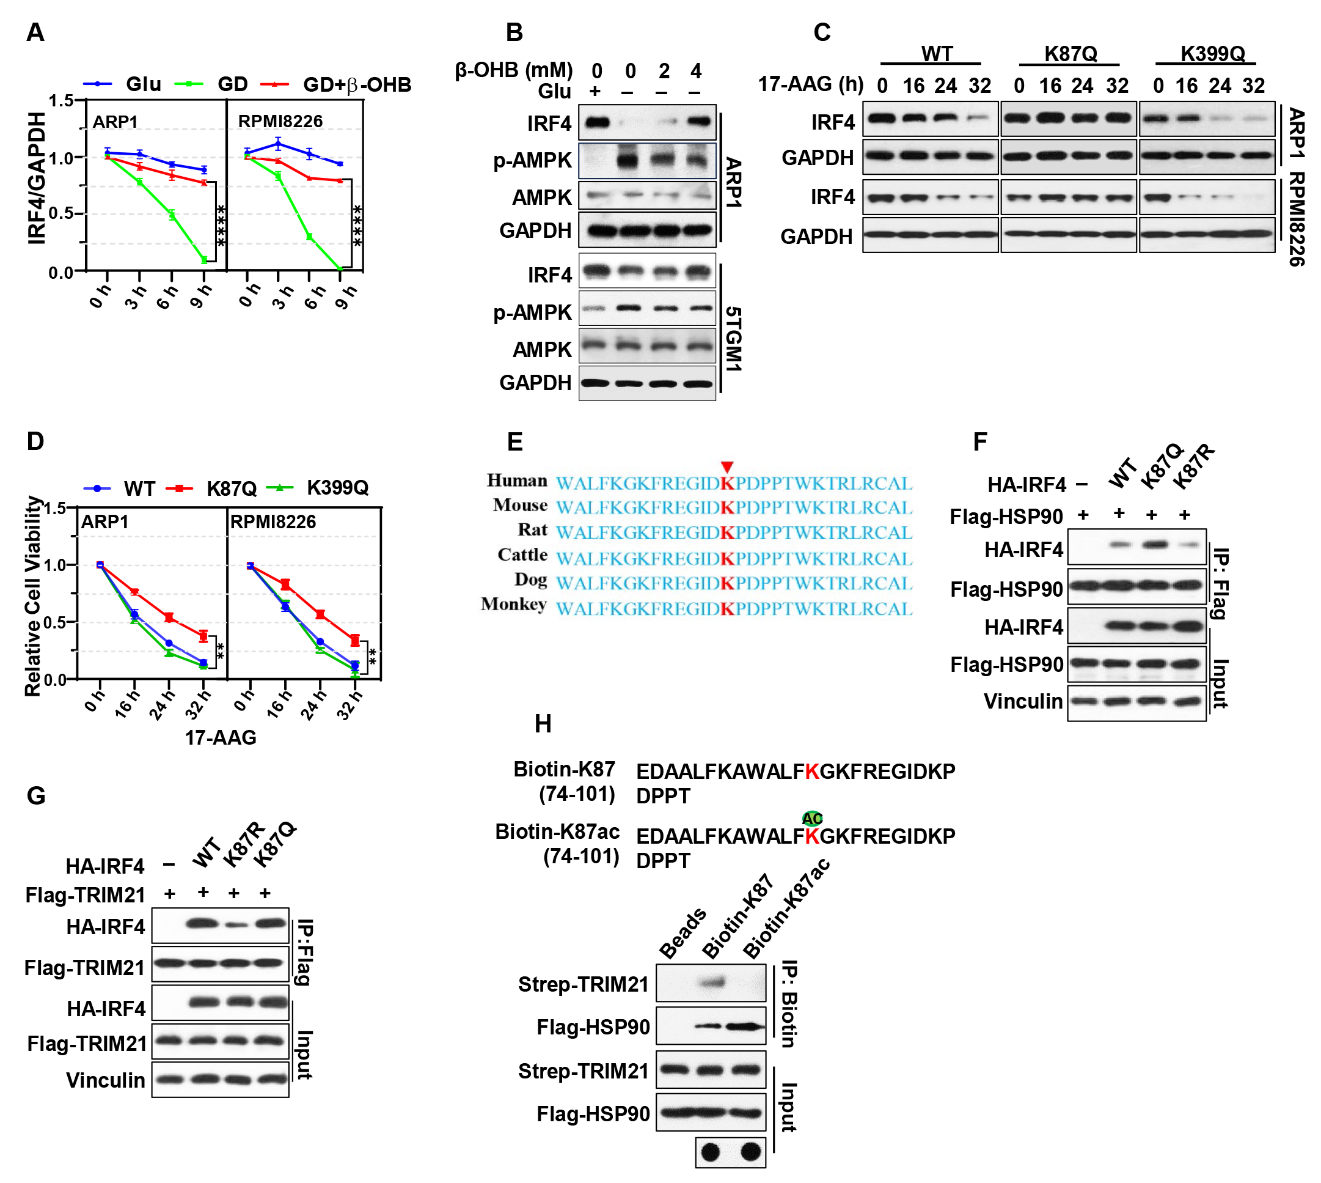


**Figure S6. β-OHB maintains IRF4 stability through triggering IRF4 acetylation**

(A) Quantification of normalized IRF4 levels relative to GAPDH in myeloma cells treated with or without 2 mM β-OHB in the presence of CHX under normal glucose or GD conditions. (B) Immunoblot analysis of IRF4, p-AMPK (Thr172), and total AMPK levels in ARP1 and 5TGM1 cells treated with β-OHB under normal glucose or GD conditions. (C-D) Protein kinetics of IRF4 (C) and cell viability (D) in myeloma cells expressing either WT, K87Q, or K399Q HA-IRF4 treated with 17-AAG for the indicated time points. (E) Conservation analysis of IRF4 lysine 87 across different species. (F) Co-IP of Flag-HSP90 with HA-IRF4 variants (WT/K87Q/K87R) in HEK293T cells under GD conditions. (G) Co-IP of Flag-TRIM21 with HA-IRF4 variants (WT/K87Q/K87R) in HEK293T cells under GD conditions. (H) Schematic representation of custom biotin-conjugated IRF4 peptides (amino acids 74-101) in acetylated (K87ac) or non-acetylated (K87) forms (top panel), and their interaction with Strep-TRIM21 and Flag-HSP90 expressed in HEK293T cells (bottom panel). Lysates from HEK293T cells expressing Strep-TRIM21 and Flag-HSP90 were incubated with the biotinylated peptides and pulled down using neutravidin agarose. Immunoprecipitates were analyzed by immunoblotting with anti-Strep and anti-Flag antibodies. Data are presented as mean ± SD and are representative of three independent experiments. Statistical significance was determined by two-way ANOVA with Bonferroni’s post hoc test (**P < 0.01; ****P < 0.0001).


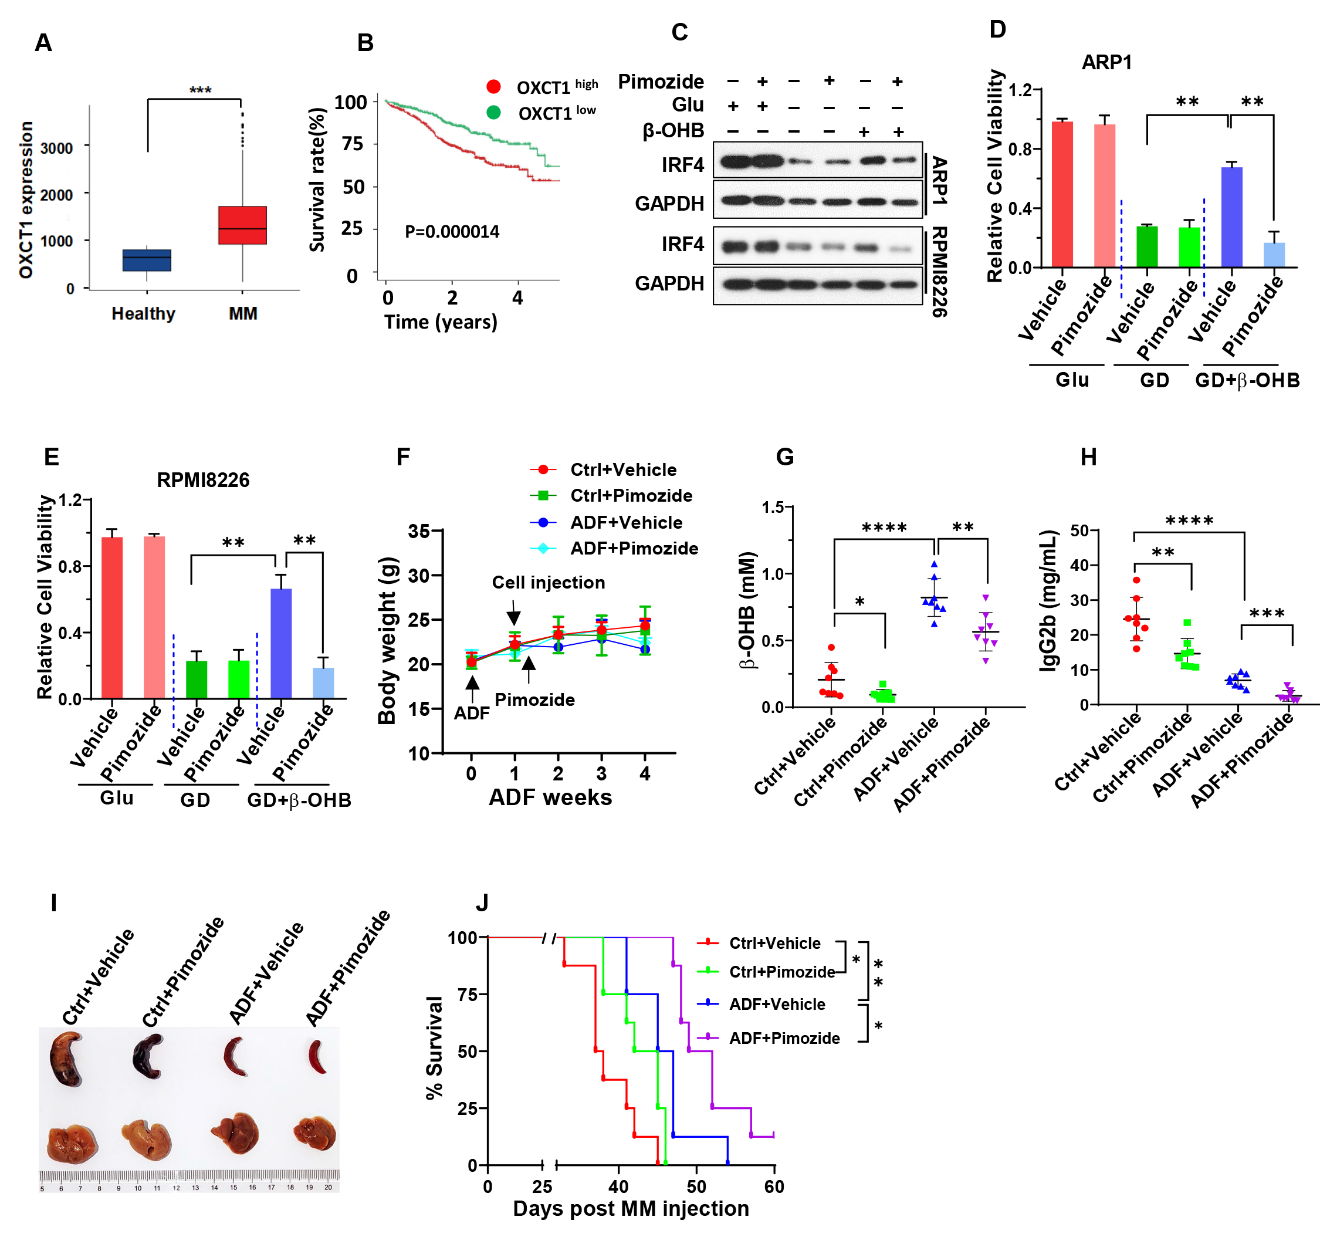


**Figure S7. OXCT1-mediated ketolysis promotes myeloma progression.**

(A) *OXCT1* mRNA levels in plasma cells from myeloma patients (n=559) versus healthy donors (n=22). (B) Kaplan-Meier survival analysis of myeloma patients stratified by *OXCT1* expression (high, n=429; low, n=430) from GEO datasets (GSE2658, GSE5900). P-value by Gehan-Breslow-Wilcoxon test. (C-E) IRF4 protein levels (C) and cell viability (D, E) in myeloma cells treated with 2 mM β-OHB plus Pimozide under normal glucose or GD conditions for 16 hours. (F-J) C57BL/6J mice received alternate-day fasting (ADF) for 1 week prior to intravenous injection with Vk12598 myeloma cells (2×106 cells/mouse), followed by bi-daily oral administration of 10 mg/kg pimozide or vehicle control for 3 weeks. (F) Mouse body weights. (G) Serum β-OHB concentrations. (H) Serum IgG2b levels. (I) Representative gross morphology of spleen and liver. (J) Kaplan-Meier analysis of mouse overall survival. P values were determined by a two-tailed Student’s t-test. *P < 0.05; **P < 0.01; ***P< 0.001; ****P< 0.0001.


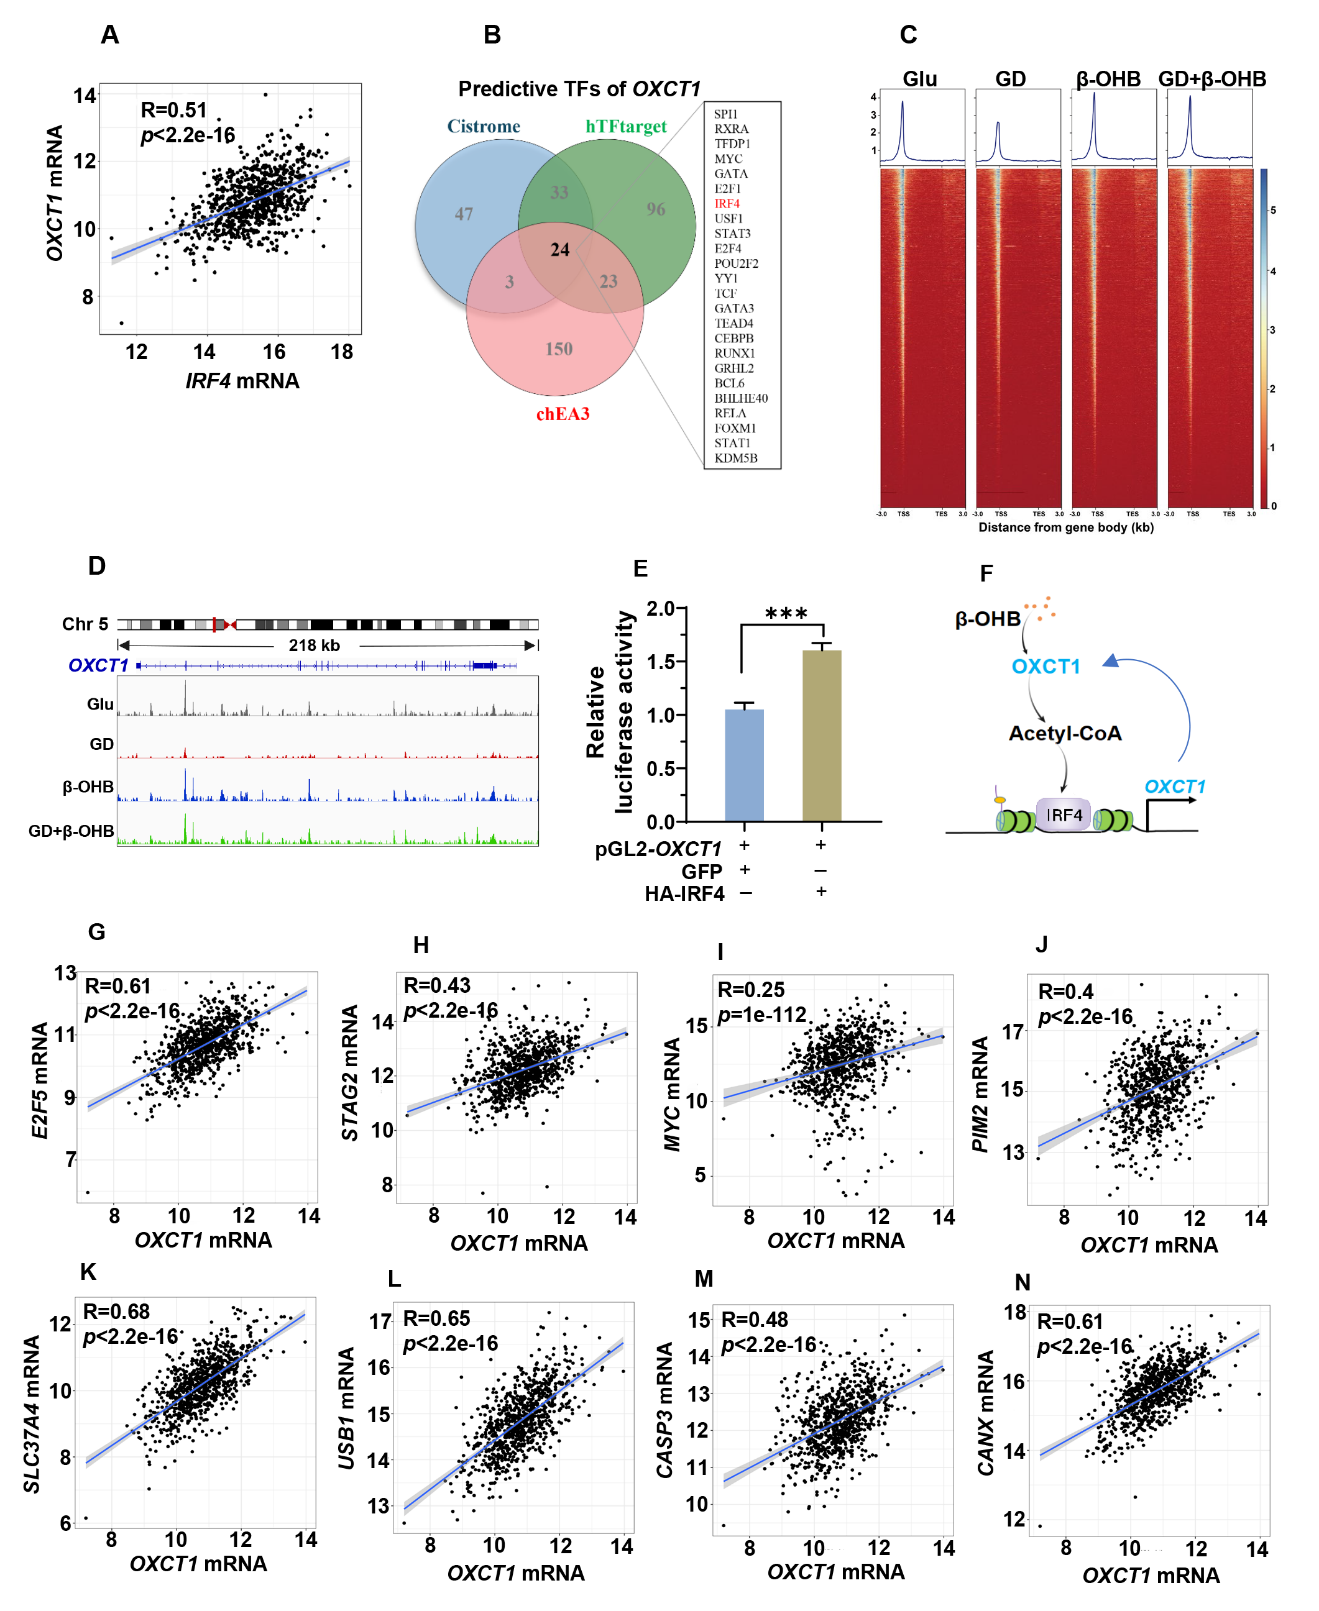


**Figure S8. Regulation of *OXCT1* transcription by IRF4 in myeloma cells.**

(A) Correlation analysis of *OXCT1* and *IRF4* mRNA expression levels in the UCSC Xena database (https://xenabrowser.net/). (B) Predicted transcription factors (TFs) regulating OXCT1 expression using Cistrome, hTFtarget, and chEA3 tools. (C) The binding density of *OXCT1* was visualized by deepTools: the heatmap presents the CUT&Tag tag counts on the different *OXCT1* binding peaks in myeloma cells treated with or without β-OHB under GD conditions, ordered by signal strength. (D) Genome browser tracks of CUT & Tag signal at representative target gene loci. (E) Luciferase reporter assay measuring *OXCT1* promoter activity in HEK293T cells co-transfected with pGL2-*OXCT1* and control vector (GFP). (F) Proposed model: OXCT1-mediated β-OHB metabolism enhances IRF4 acetylation at K87 and transcriptionally regulates *OXCT1* expression, establishing a feed-forward regulatory loop. (G-N) Correlation analysis of *OXCT1* and various IRF4 target gene levels in the UCSC Xena database (<https://xenabrowser.net/>). P values were determined by a two-tailed Student’s t-test. *** P < 0.001.


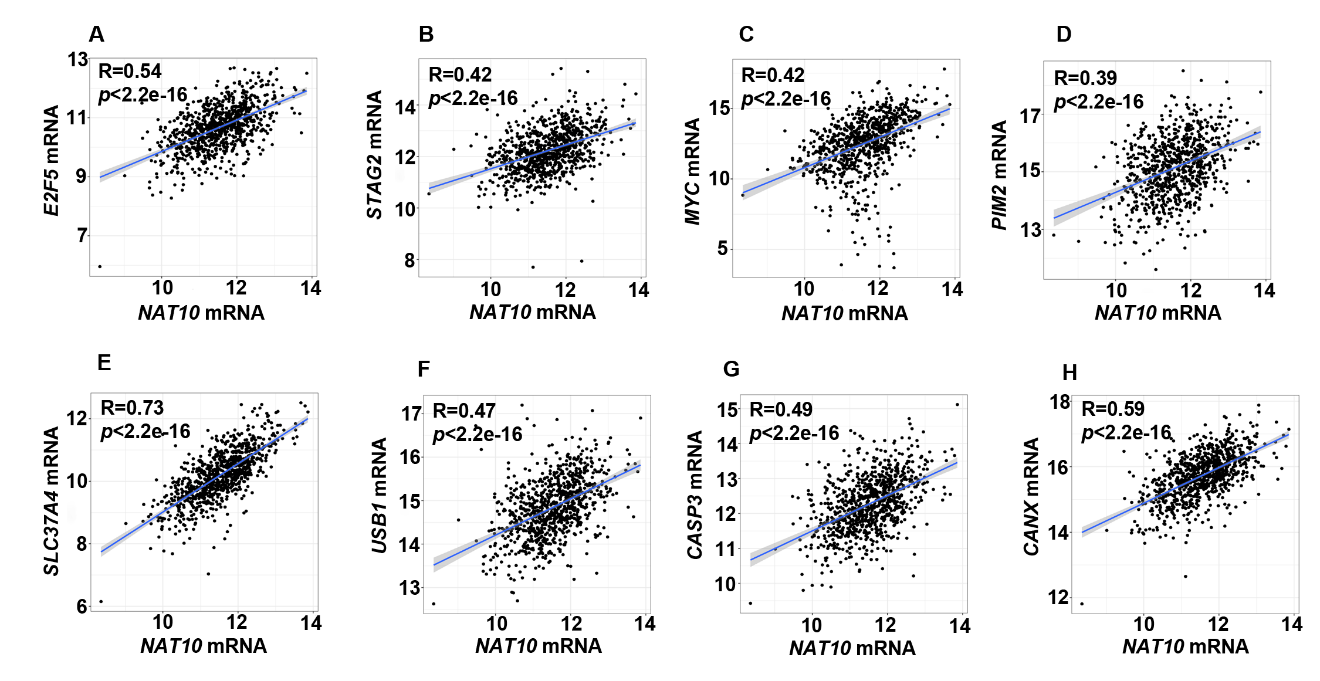


**Figure S9. Positive correlation of *NAT10* and IRF4 target genes.**

（A-H）Correlation analysis of *NAT10* mRNA levels and various IRF4 target gene levels in the UCSC Xena database (<https://xenabrowser.net/>).

**Supplementary Tables**

**Table S1. Primers used in real-time PCR analysis for amplifying human genes. Related to STAR Methods.**

| **Gene** | **Forward** | **Reverse** |
| --- | --- | --- |
| *ATAC1* | ATGCCAGTACACTGAATGATGG | GATGCAGCATATACAGGAGCAA |
| *BDH1* | GGCAGAAGTGAACCTTTGGG | GCAGTCCGAGAAAGCCTCTAC |
| *HMGCS2* | GACTCCAGTGAAGCGCATTCT | CTGGGAAGTAGACCTCCAGG |
| *HMGCL* | TCAGCACCTCATCTATGGGCA | GGAACCCACTTAGGAGACACAAA |
| *OXCT1* | GTTGGTGGTTTTGGGCTATGT | AGACCATGCGTTTTATCTGCTT |
| *FBXW11* | CCTACGACACAGCCCAAATG | AACAATGGCGAAGGGCAAAT |
| *GAPDH* | GCACCGTCAAGGCTGAGAAC | TGGTGAAGACGCCAGTGGA |
| *TRIM21* | TCAAGAATCTCCGGCCCAAT | AGGGCCTTCCCATCTTTCTC |

**Table S2. Primers used in real-time PCR analysis for amplifying mouse genes. Related to STAR Methods.**

| **Gene** | **Forward** | **Reverse** |
| --- | --- | --- |
| *Atac1* | CAGGAAGTAAGATGCCTGGAAC | TTCACCCCCTTGGATGACATT |
| *Bdh1* | ACAAGACACACGCTGTTGTTT | CTCTTCAAGCTGTCCAGTTCC |
| *Hmgcs2* | GAAGAGAGCGATGCAGGAAAC | GTCCACATATTGGGCTGGAAA |
| *Hmgcl* | CAGGTGAAGATCGTGGAAGTC | GGAGCCCTGCTTCGGAAAC |
| *Oxct1* | CATAAGGGGTGTGTCTGCTACT | GCAAGGTTGCACCATTAGGAAT |
| *Gapdh* | AGGTCGGTGTGAACGGATTTG | TGTAGACCATGTAGTTGAGGTCA |

**Table S3. Primers used in subcloning of short-hairpin RNA into the pLKO.1 vector. Related to STAR Methods.**

| shRNA | Direction | Sequence |
| --- | --- | --- |
| sh*HSP90*-1 | Forward | CCGGTACTTGGAGGAACGAAGAATACTCGAGTATTCTTCGTTCCTCCAAGTATTTTTG |
| Reverse | AATTCAAAAATACTTGGAGGAACGAAGAATACTCGAGTATTCTTCGTTCCTCCAAGTA |
| sh*HSP90*-2 | Forward | CCGGTATGGCATGACAACTACTTTACTCGAGTAAAGTAGTTGTCATGCCATATTTTTG |
| Reverse | AATTCAAAAATATGGCATGACAACTACTTTACTCGAGTAAAGTAGTTGTCATGCCATA |
| sh*TRIM21*-1 | Forward | CCGGTGGCATGGTCTCCTTCTACAACTCGAGTTGTAGAAGGAGACCATGCCATTTTTG |
|  | Reverse | AATTCAAAAATGGCATGGTCTCCTTCTACAACTCGAGTTGTAGAAGGAGACCATGCCA |
| sh*TRIM21*-2 | Forward | CCGGGAGTTGGCTGAGAAGTTGGAACTCGAGTTCCAACTTCTCAGCCAACTCTTTTTG |
| Reverse | AATTCAAAAAGAGTTGGCTGAGAAGTTGGAACTCGAGTTCCAACTTCTCAGCCAACTC |
| sh*FBXW11*-1 | Forward | CCGGTATCAGTGGCCTACGAGATAACTCGAGTTATCTCGTAGGCCACTGATATTTTTG |
| Reverse | AATTCAAAAATATCAGTGGCCTACGAGATAACTCGAGTTATCTCGTAGGCCACTGATA |
| sh*FBXW11*-2 | Forward | CCGGACTCTTCAAGTACCGACATTTCTCGAGAAATGTCGGTACTTGAAGAGTTTTTTG |
| Reverse | AATTCAAAAAACTCTTCAAGTACCGACATTTCTCGAGAAATGTCGGTACTTGAAGAGT |
| sh*Ctrl*-1 | Forward | CCGGCCTAAGGTTAAGTCGCCCTCGCTCGAGCGAGGGCGACTTAACCTTAGGTTTTTG |
| Reverse | AATTCAAAAACCTAAGGTTAAGTCGCCCTCGCTCGAGCGAGGGCGACTTAACCTTAGG |
| sh*NAT10*-1 | Forward | CCGGCGCAAAGTTGTGAAGCTATTTCTCGAGAAATAGCTTCACAACTTTGCGTTTTTG |
| Reverse | AATTCAAAAACGCAAAGTTGTGAAGCTATTTCTCGAGAAATAGCTTCACAACTTTGCG |
| sh*NAT10*-2 | Forward | CCGGGAGATGTATTCACGGAATATGCTCGAGCATATTCCGTGAATACATCTCTTTTTG |
| Reverse | AATTCAAAAAGAGATGTATTCACGGAATATGCTCGAGCATATTCCGTGAATACATCTC |
| sh*OXCT1*-1 | Forward | CCGGCCTGGTACAAGGGATGTGTTTCTCGAGAAACACATCCCTTGTACCAGGTTTTTG |
| Reverse | AATTCAAAAACCTGGTACAAGGGATGTGTTTCTCGAGAAACACATCCCTTGTACCAGG |
| sh*OXCT1*-2 | Forward | CCGGCCAATGCAGCAGATCGCAAATCTCGAGATTTGCGATCTGCTGCATTGGTTTTTG |
| Reverse | AATTCAAAAACCAATGCAGCAGATCGCAAATCTCGAGATTTGCGATCTGCTGCATTGG |

**Table S4. Primers used in Luciferase assay.**

| **Gene Promoter** | **Direction** | **Sequence** | |
| --- | --- | --- | --- |
| *OXCT1* | Forward | | ACTGCCTTTCAAAGCAAGTG |
| Reverse | | GCTTTTAAAAGAAGTGAGGCT |

**REFERENCES**

Elgendy, M., Cirò, M., Hosseini, A., Weiszmann, J., Mazzarella, L., Ferrari, E., Cazzoli, R., Curigliano, G., DeCensi, A., Bonanni, B., et al. (2019). Combination of Hypoglycemia and Metformin Impairs Tumor Metabolic Plasticity and Growth by Modulating the PP2A-GSK3β-MCL-1 Axis. Cancer cell *35*, 798-815.e795.

Ezpeleta, M., Gabel, K., Cienfuegos, S., Kalam, F., Lin, S., Pavlou, V., Song, Z., Haus, J.M., Koppe, S., Alexandria, S.J., et al. (2023). Effect of alternate day fasting combined with aerobic exercise on non-alcoholic fatty liver disease: A randomized controlled trial. Cell metabolism *35*, 56-70.e53.

Hariri, N., and Thibault, L. (2010). High-fat diet-induced obesity in animal models. Nutrition research reviews *23*, 270-299.

Ianevski, A., Giri, A.K., and Aittokallio, T. (2022). SynergyFinder 3.0: an interactive analysis and consensus interpretation of multi-drug synergies across multiple samples. Nucleic acids research *50*, W739-w743.

Li, Z., Liu, H., He, J., Wang, Z., Yin, Z., You, G., Wang, Z., Davis, R.E., Lin, P., Bergsagel, P.L., et al. (2021). Acetyl-CoA Synthetase 2: A Critical Linkage in Obesity-Induced Tumorigenesis in Myeloma. Cell metabolism *33*, 78-93.e77.

Mitry, R.R., and Hughes, R.D.J.H.P. (2011). Human Cell Culture Protocols.

Pan, R.Y., He, L., Zhang, J., Liu, X., Liao, Y., Gao, J., Liao, Y., Yan, Y., Li, Q., Zhou, X., et al. (2022). Positive feedback regulation of microglial glucose metabolism by histone H4 lysine 12 lactylation in Alzheimer's disease. Cell metabolism *34*, 634-648.e636.

Xie, R., Cheng, L., Huang, M., Huang, L., Chen, Z., Zhang, Q., Li, H., Lu, J., Wang, H., Zhou, Q., et al. (2023). NAT10 Drives Cisplatin Chemoresistance by Enhancing ac4C-Associated DNA Repair in Bladder Cancer. Cancer research *83*, 1666-1683.

Zhu, C.X., Yan, K., Chen, L., Huang, R.R., Bian, Z.H., Wei, H.R., Gu, X.M., Zhao, Y.Y., Liu, M.C., Suo, C.X., et al. (2024). Targeting OXCT1-mediated ketone metabolism reprograms macrophages to promote antitumor immunity via CD8(+) T cells in hepatocellular carcinoma. Journal of hepatology *81*, 690-703.
